# Supplementary material for: An inducible transgenic mouse breast cancer model for the analysis of tumor antigen specific CD8+ T-cell responses
Source: PubMed Central journal article supplement (PMC4770716; doi:10.18632/oncotarget.5750), 2015-10-19
Supplement: oncotarget-06-38487-s001.pdf [file oncotarget-06-38487-s001.pdf]

## SUPPLEMENTARY FIGURE

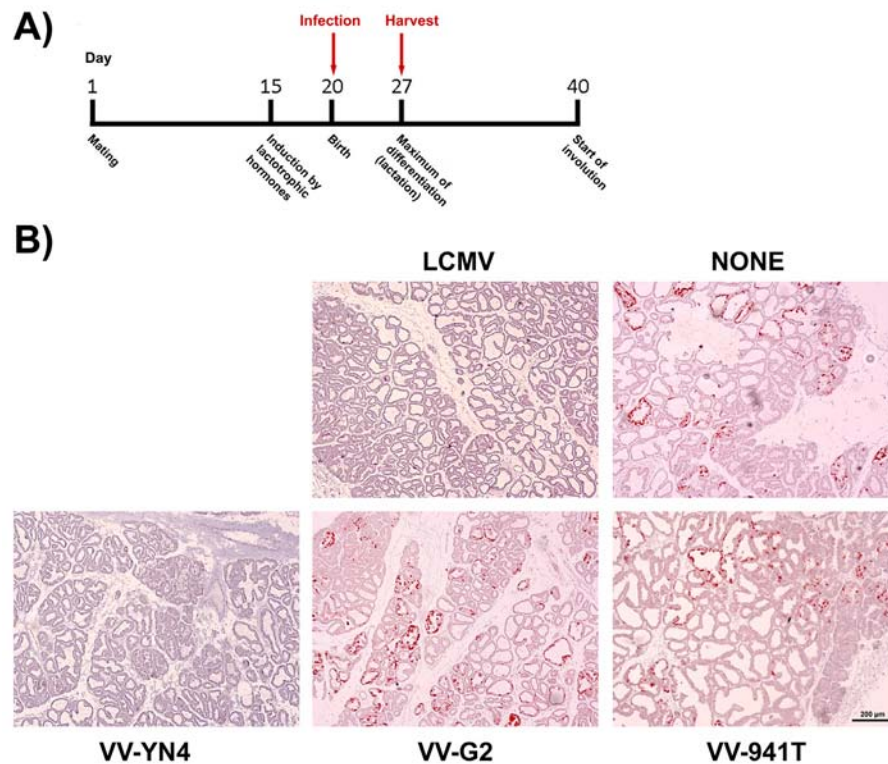

**Supplementary Figure S1: Infection of lactating NP8 mice with LCMV and VV recombinants for the analysis of a specific immune reaction against the LCMV NP<sub>118-126</sub>-epitope in T-Ag<sub>NP</sub>.** **A.** Time line for harvesting the mammary glands after infection; four mice per group were analyzed by immune histology after staining with anti-T-Ag antibodies; a representative experiment is shown. **B** Infection of transgenic mice with  $10^5$  PFU of VV recombinants containing either the glycoprotein-precursor (VV-G2), the NP of LCMV (VV-YN4) or the T-Ag of SV40 (VV-941T). As negative and positive controls, the same number of not infected (None) as well as with  $10^5$  PFU of LCMV infected NP8 mice (LCMV) were examined in parallel.
